# Supplementary material for: Before and After: Attitude and Adverse Effects Induced by the First and Second Doses of mRNA BNT162b2 Vaccine among Healthcare Professionals in the First Weeks after Their Introduction in Poland
Source: MDPI journal article supplement (doi:10.3390/vaccines11050883), 2023-04-22
Supplement: s1 [file s1]

QUESTIONNAIRE FOR PATIENT ATTENDING **DOSE II OF** COVID-19 mRNA VACCINATION

**AGE:**

**GENDER:** female, male

**Place of residence:**

☐ village

☐ city of up to: 50,000 inhabitants ☐ , city of 50,000 to 100,000 ☐ , city of 100,000 to 500,000 ☐ , city of more than 500,000 inhabitants

**Number of people living together:** ..... **Number of rooms:**.....

**Education:** .....

**Are you in active employment?** ☐ Yes ☐ No

**Occupation:** doctor, nurse, paramedic, orderly, administrative worker, technical worker (please tick the appropriate one)

**What is your blood group?** .....

**Do you smoke cigarettes?** ☐ Yes ☐ No

**Do you drink alcohol?** ☐ Yes ☐ No ☐ Occasionally

**Do you regularly engage in any sports activities?** .....

**Do you regularly vaccinate against influenza?**

☐ YES

☐ No (please state the reason).....

**Which diseases/pathogens did you vaccinate against as an adult (please tick the appropriate one)**

Hepatitis B Hepatitis A Pneumococcus Meningococcus Tetanus Diphtheria

Other.....

**Do you regularly take vitamin D3 (in what doses)?**

☐ YES

☐ No

**Do you take nutritional supplements?**

☐ YES, .....(please specify which ones)

☐ No

**Do you suffer from chronic diseases such as, for example, diabetes, hypertension, heart disease, respiratory diseases (e.g. COPD), cancer and others?**

☐ Yes, ..... (please specify)

☐ No

**Do you take chronic medication?**

☐ Yes, .....(please specify)

☐ No

**Do you have a blood coagulation disorder /myelopoiesis, plasma blemishes, congenital thrombosis/ are you taking anticoagulants?**

☐ Yes

☐ No

**Have you been diagnosed with an immune disorder (primary/ secondary immunodeficiency)?**

☐ Yes

☐ No

**Are you taking medications with immunosuppressive effects?**

☐ Yes

☐ No

**Do you suffer from allergic rhinitis and/or conjunctivitis, bronchial asthma, atopic dermatitis, contact dermatitis, angioedema, acute/chronic urticaria?**

☐ YES, ..... (please specify the disease)

☐ I have symptoms of one or more of the diseases listed, but have not yet been diagnosed

☐ Not found

**Have you ever had any adverse vaccination reactions?**

☐ Yes, ..... (please specify which ones and after which vaccine)

☐ No

**Have you ever had a serious allergic reaction to drugs/contrast agents/food/insect venom/contact agents e.g. dyes, heavy metals, latex, rubber?**

☐ YES, .....(please specify)

☐ No

**Have you ever had an anaphylactic reaction, including anaphylactic shock?**

☐ YES, ..... (please specify the triggering factor)

☐ YES, the triggering factor has not been established

☐ NO

**Have you ever received adrenaline in your life for the treatment of an allergic reaction?**

☐ Yes

☐ No

**Do you have a history of SARS-CoV-2 infection?**

☐ YES, confirmed by molecular testing (PCR) or antigen test

☐ I had/have typical symptoms of SARS-CoV-2 infection, but without confirmation by laboratory tests

☐ I have a positive titer of anti-CoV IgG antibodies and have had symptoms of infection

☐ I have a positive titer of anti-CoV IgG antibodies, but have had no symptoms of infection

☐ NO

**Did you experience any adverse reactions after receiving the first dose of the vaccine; if so, on which day?**

☐ Yes

☐ No

|  |                            |                                |                               |                                |         |                 |         |       |                   |
|--|----------------------------|--------------------------------|-------------------------------|--------------------------------|---------|-----------------|---------|-------|-------------------|
|  | Pain at the injection site | Swelling at the injection site | Redness at the injection site | Pruritus at the injection site | Fatigue | Poor well-being | Shivers | Fever | Muscle/joint pain |
|--|----------------------------|--------------------------------|-------------------------------|--------------------------------|---------|-----------------|---------|-------|-------------------|

|          |  |  |  |  |  |  |  |  |  |
|----------|--|--|--|--|--|--|--|--|--|
| YES      |  |  |  |  |  |  |  |  |  |
| NO       |  |  |  |  |  |  |  |  |  |
| Duration |  |  |  |  |  |  |  |  |  |

|          |          |        |           |                            |          |                                     |                   |                                                            |
|----------|----------|--------|-----------|----------------------------|----------|-------------------------------------|-------------------|------------------------------------------------------------|
|          | Headache | Nausea | Diarrhoea | Enlargement of lymph nodes | Insomnia | Acute peripheral facial nerve palsy | Allergic reaction | Anaphylaxis/anaphylactic shock requiring adrenaline supply |
| YES      |          |        |           |                            |          |                                     |                   |                                                            |
| NO       |          |        |           |                            |          |                                     |                   |                                                            |
| Duration |          |        |           |                            |          |                                     |                   |                                                            |

**Have you had any other symptoms of concern not included above within 7/21 days of the first dose?**

☐ YES, ..... (please specify) ☐ NO

**Have the symptoms listed above affected your life activities?**

☐ YES ☐ NO ☐ I did not have any adverse reactions after vaccination

**Did you experience symptoms of an allergic reaction within 15-30 minutes after the first dose of the vaccine, such as (please tick the appropriate ones)**

☐ Urticaria ☐ Angioedema ☐ Shortness of breath ☐ Rhinitis ☐ Watery eyes ☐ Anaphylactic shock ☐ None of the following

**Do you feel apprehensive about the second dose of vaccination against SARS-CoV-2 ?**

☐ Yes, greater than before the first dose of the vaccine, .....(please specify)

☐ Yes, smaller than before the first dose of the vaccine

☐ No

**Did you have a test for SARS-CoV-2 infection between the first and second doses of the vaccine?**

☐ YES, the result was positive ☐ YES, the result was negative ☐ NO
