# Supplementary material for: Before and After: Attitude and Adverse Effects Induced by the First and Second Doses of mRNA BNT162b2 Vaccine among Healthcare Professionals in the First Weeks after Their Introduction in Poland
Source: MDPI journal article supplement (doi:10.3390/vaccines11050883), 2023-04-22
Supplement: s1 [file s1]

## QUESTIONNAIRE FOR A PATIENT WHO HAS RECEIVED TWO DOSES OF mRNA VACCINATION against COVID-19

**AGE:**

**GENDER:** female, male

**Place of residence:**

☐ village

☐ city of up to 50,000 inhabitants ☐ city of 50,000 to 100,000 inhabitants ☐ city of 100,000 to 500,000 inhabitants ☐ city of more than 500,000 inhabitants

**Education:** .....

**Are you a health care professional?** ☐ YES ☐ NO

**Occupation:** doctor, nurse, paramedic, orderly, administrative worker, technical worker (please tick the appropriate one)

**Do you have a history of SARS-CoV-2 infection?**

☐ YES, confirmed by molecular testing (PCR) or antigen test

☐ I had/have typical symptoms of SARS-CoV-2 infection, but without confirmation by laboratory tests

☐ I have a positive titer of anti-CoV IgG antibodies and have had symptoms of infection

☐ I have a positive titer of anti-CoV IgG antibodies, but have had no symptoms of infection

☐ NO

**If you have experienced SARS-CoV-2 infection, please tick the symptoms you experienced during the infection:**

☐ fever

☐ weakness

☐ chills

☐ muscle/joint pain

☐ headache

☐ cough

☐ loss of smell

☐ olfactory disorders such as abnormal olfactory sensations/unpleasant odours

☐ loss of taste

☐ abdominal pain

☐ nausea, vomiting

☐ diarrhoea

☐ other ..... (please specify)

**Did you experience SARS-CoV-2 infection after receiving the 1st dose of vaccine?**

☐ YES, confirmed by molecular testing (PCR) or antigen test, ..... (number of days after the 1st dose)

☐ NO

**Did you experience any adverse reactions after receiving the first and second doses of the vaccine?**

☐ Yes

☐ No

**After the 1st dose:**

| SYMPTOM                        | YES | NO | DURATION |
|--------------------------------|-----|----|----------|
| pain at the injection site     |     |    |          |
| swelling at the injection site |     |    |          |
| redness at the injection site  |     |    |          |
| pruritus at the injection site |     |    |          |
| fatigue                        |     |    |          |
| poor well-being                |     |    |          |
| shivers                        |     |    |          |
| fever                          |     |    |          |
| muscle/joint pain              |     |    |          |
| nausea/vomiting                |     |    |          |
| headache                       |     |    |          |
| diarrhea                       |     |    |          |

|                                                                      |  |  |  |
|----------------------------------------------------------------------|--|--|--|
| lymph node enlargement                                               |  |  |  |
| insomnia                                                             |  |  |  |
| acute peripheral facial nerve paralysis                              |  |  |  |
| allergic reaction                                                    |  |  |  |
| anaphylaxis / anaphylactic shock requiring adrenaline administration |  |  |  |
| olfactory disorder                                                   |  |  |  |
| taste sensation disorders                                            |  |  |  |
| others                                                               |  |  |  |

**After the 2nd dose:**

| SYMPTOM                        | YES | NO | DURATION |
|--------------------------------|-----|----|----------|
| pain at the injection site     |     |    |          |
| swelling at the injection site |     |    |          |
| redness at the injection site  |     |    |          |
| pruritus at the injection site |     |    |          |
| fatigue                        |     |    |          |
| poor well-being                |     |    |          |

|                                                                      |  |  |  |
|----------------------------------------------------------------------|--|--|--|
| shivers                                                              |  |  |  |
| fever                                                                |  |  |  |
| muscle/joint pain                                                    |  |  |  |
| nausea/vomiting                                                      |  |  |  |
| headache                                                             |  |  |  |
| diarrhea                                                             |  |  |  |
| lymph node enlargement                                               |  |  |  |
| insomnia                                                             |  |  |  |
| acute peripheral facial nerve paralysis                              |  |  |  |
| allergic reaction                                                    |  |  |  |
| anaphylaxis / anaphylactic shock requiring adrenaline administration |  |  |  |
| olfactory disorder                                                   |  |  |  |
| taste sensation disorders                                            |  |  |  |
| others                                                               |  |  |  |

Please fill in only if you are a recovering patient:

In your opinion, were the adverse reactions after vaccination similar to those during SARS-CoV-2 infection?

☐ YES

☐ NO

Have you also previously had post-vaccination reactions to other vaccinations?

☐ YES

☐ NO

Please indicate which vaccines were followed by adverse reactions:

influenza      pneumococcus      meningococcus      tetanus      hepatitis A      hepatitis B

Please indicate which post-vaccination reactions have occurred:

- pain at the injection site
- redness + swelling
- headache
- shivers
- feeling of breakdown
- muscle pains
- fever
- enlargement of lymph nodes
- facial nerve paralysis
- rash
- swelling of the lips and tongue
- anaphylactic shock

Do you supplement with Vit. D, If yes, in what dose?

- regularly
- occasionally
- no

Do you have a chronic illness? If yes, please tick which one:

- hypertension
- type 1 diabetes
- type 2 diabetes
- obesity

- POCHP
- recurrent respiratory tract infections
- bronchial asthma
- heart diseases (which ones)
- cancer (which one)
